# Supplementary material
Source: publisher site journal article supplement (https://www.dovepress.com/article/284800)

## Supplemental Figures

Supplemental Figure 1. AhR level was decreased in lung of *Scgblal-Cre; AhR<sup>fllox/fllox</sup>* mice.

Supplemental Figure 2. Mice with AhR-deficient club cells had smaller lungs.

Supplemental Figure 3. Lung tissues were examined the CC10 expression in *Scgblal-Cre* and *Scgblal-Cre; AhR<sup>fllox/fllox</sup>* mice with vehicle or OVA treatment.

Supplemental Figure 4. Lung tissues were examined the Notch1 expression in *Scgblal-Cre* and *Scgblal-Cre; AhR<sup>fllox/fllox</sup>* mice with vehicle or OVA treatment.

# Supplemental Figure 1

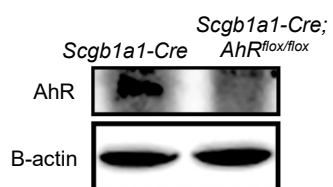

# Supplemental Figure 2

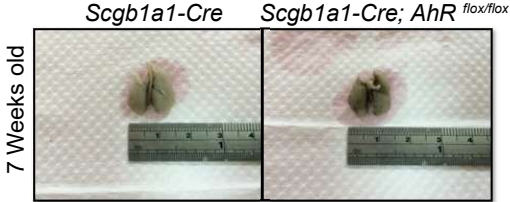

| The weight of lung (mg)/The body weight (g) |                    |                   |
|---------------------------------------------|--------------------|-------------------|
| Genotype                                    | (2 weeks)          | (7 weeks)         |
| <i>Scgb1a1-Cre</i>                          | 16.90±1.12         | 22.52±1.52        |
| <i>Scgb1a1-Cre; AhR<sup>flox/flox</sup></i> | 14.60±0.96<br>(**) | 16.5±0.87<br>(**) |

# Supplemental Figure 3

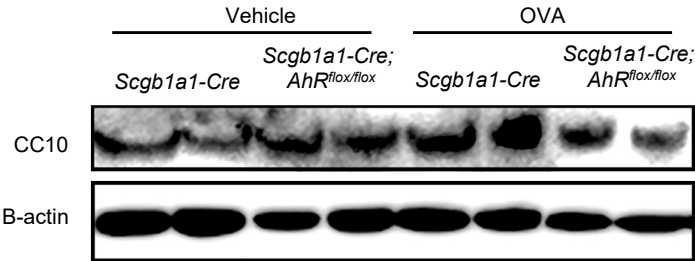

# Supplemental Figure 4

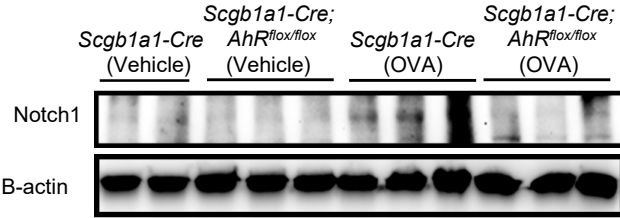

Supplement: Supplementary file 1 [file get_supplementary_file.php]
